# Supplementary material
Source: PubMed Central journal article supplement (PMC10084352)
Supplement: JBMR-37-2077-s001.pdf [file JBMR-37-2077-s001.pdf]

## Supplemental Material

**Figure S1.** *Acvr1*<sup>tnR206H</sup>, *Acvr1*<sup>flox</sup>, and *R26*<sup>nACVR1</sup> conditional alleles.

**Figure S2.** Limb skeletal defects in *Acvr1*<sup>R206H/+</sup> mutant mice.

**Figure S3.** Effects of *Acvr1*<sup>R206H</sup> and *R26*<sup>ACVR1</sup> alleles on rib development.

**Figure S4.** Spontaneous exostosis in the legs of some aged mice that carried the *R26*<sup>ACVR1</sup> allele.

**Figure S5.** Inhibition of exacerbated HO by *ACVR1* over-expression.

**Figure S6.** Injury-induced hyper-cellularity of intermuscular fascia.

**Figure S7.** No discernible effect of *ACVR1* over-expression on pSMAD1/5/8 or SOX9 levels in the TA muscle 3 days post-injury.

## Supplemental Figure 1

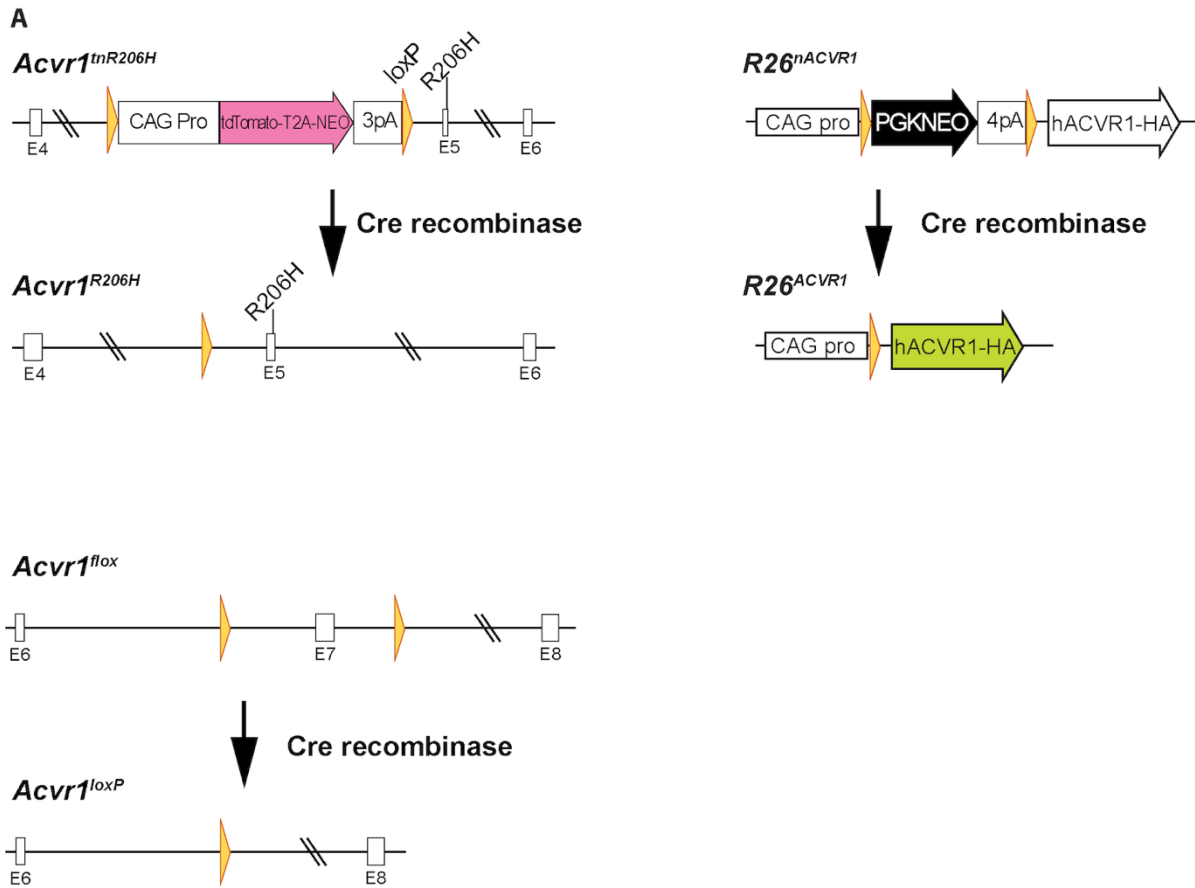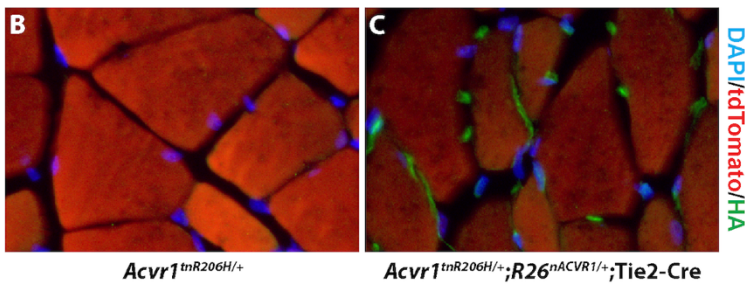

**Figure S1.** *Acvr1<sup>tnR206H</sup>*, *Acvr1<sup>lox</sup>*, and *R26<sup>nACVR1</sup>* conditional alleles. **(A)** Schematic representation of Cre-dependent recombination of the *Acvr1<sup>tnR206H</sup>* (9) *Acvr1<sup>lox</sup>* (32) and *R26<sup>nACVR1</sup>* alleles, with allele designations before and after recombination shown. **(B, C)** Detection of HA-tagged human ACVR1 protein by HA-immunofluorescence. **(B)** Fluorescent image of a cross-section of the TA muscle of an *Acvr1<sup>tnR206H/+</sup>* control mouse. The unrecombined *Acvr1<sup>tnR206H</sup>* allele expresses tdTomato and labels the myofibers. **(C)** Muscle section from an *Acvr1<sup>tnR206H/+</sup>; R26<sup>nACVR1/+</sup>; Tie2-Cre* mouse. Vascular elements and Tie2<sup>+</sup> mesenchymal progenitors express ACVR1-HA, as detected by immunofluorescence imaging (green).

Supplemental Figure 2

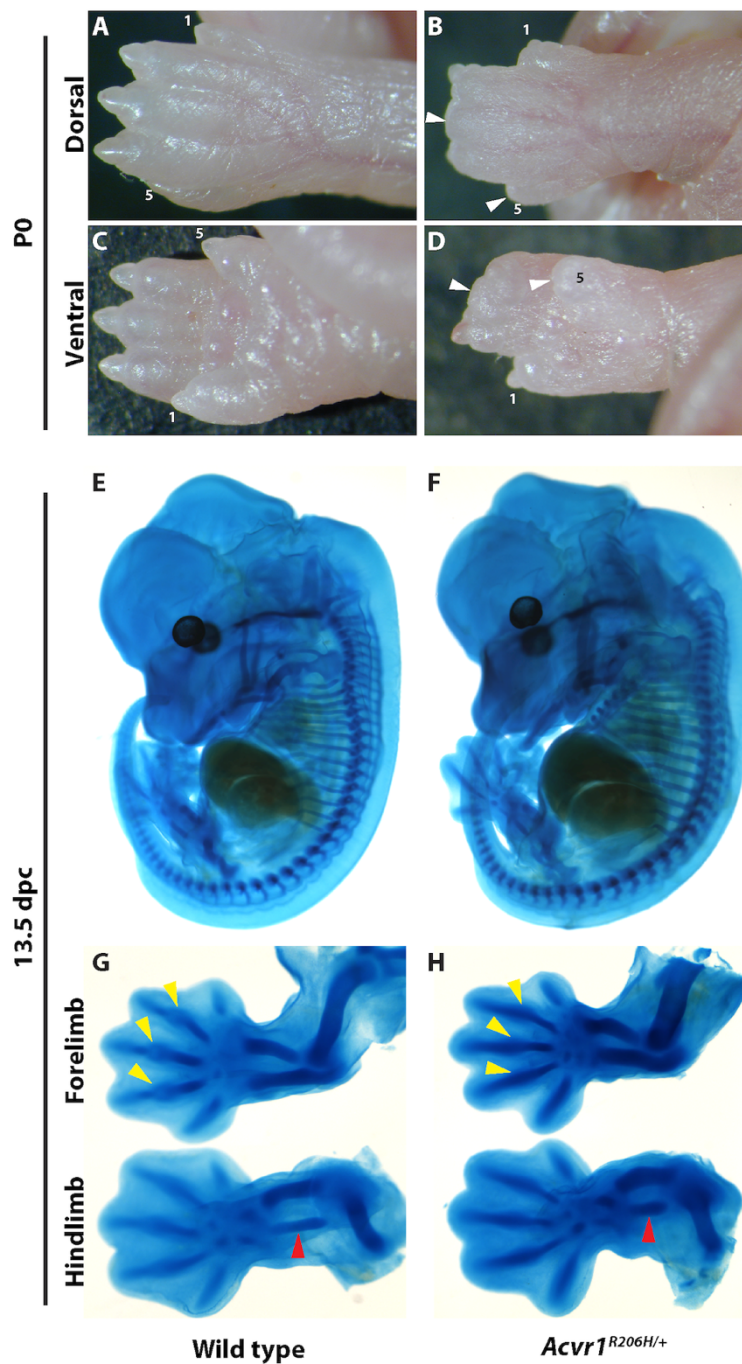

**Figure S2. Limb skeletal defects in *Acvr1<sup>R206H/+</sup>* mutant mice. (A-D)** Defects of the hindlimb autopod in P0 mice. The first and fifth toes are labeled 1 and 5, respectively. In *Acvr1<sup>R206H/+</sup>* neonates, separation of the toes is incomplete, and some toes are distally truncated (white arrowheads). **(E-H)** Abnormal limb skeletal patterning in *Acvr1<sup>R206H/+</sup>* embryos. Alcian blue staining of wild-type (E, G) and *Acvr1<sup>R206H/+</sup>* (F, H) whole mount embryos and limbs at 13.5 dpc. Early manifestations of skeletal defects in *Acvr1<sup>R206H/+</sup>* animals include a likely defect in formation of the metacarpophalangeal joints in the forelimb (yellow arrowheads), and shortening of the fibula (red arrowheads).

### Supplemental Figure 3

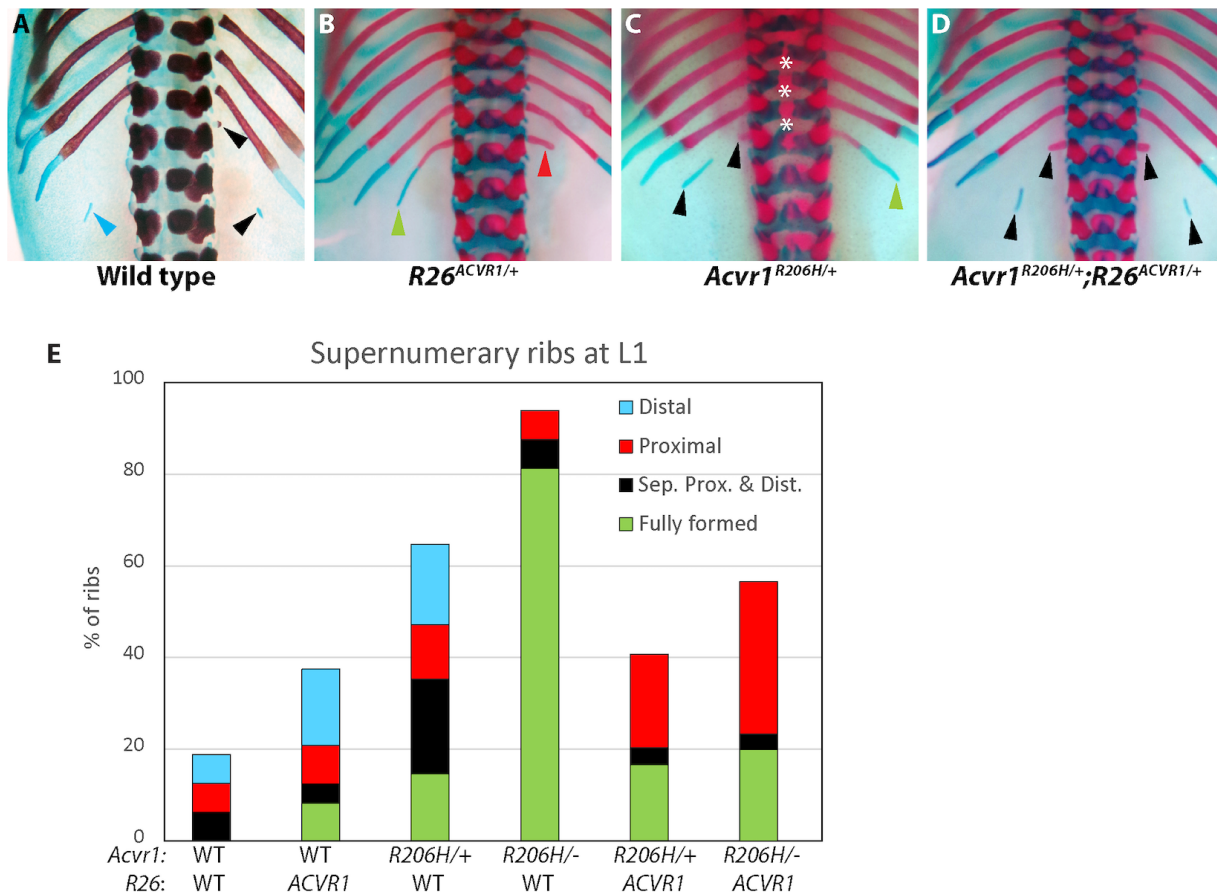

**Figure S3. Effects of *Acvr1*<sup>R206H</sup> and *R26*<sup>ACVR1</sup> alleles on rib development.** (A-D) Representative images of P0 neonates with supernumerary ribs at the 1st lumbar (L1) level. (A) wild-type (WT) neonate with a floating distal cartilage (blue arrowheads) on the left side and a separated proximal protrusion and floating cartilage (black arrowheads) on the right side. (B) *R26*<sup>ACVR1/+</sup> mouse with a fully formed L1 rib (left, green arrowhead) and a proximal bony protrusion (right, red arrowhead). (C) *Acvr1*<sup>R206H/+</sup> mouse with a proximal protrusion and a floating cartilage (left, black arrowheads) and a fully formed extra rib (right, green arrowhead). Area of mild spina bifida at the lower-thoracic/upper-lumbar level is denoted with asterisks. (D) *Acvr1*<sup>R206H/+</sup>;*R26*<sup>ACVR1/+</sup> mouse with a pair of separated proximal and distal rib compartments on both left and right L1 sides. (E) Quantification of the occurrence of L1 supernumerary ribs with different developmental structures. Left- and right-side structures were counted separately. For *Acvr1*<sup>R206H/-</sup> genotypes, the null allele was either the unrecombined *Acvr1*<sup>tnR206H</sup> allele, or the germline-recombined *Acvr1*<sup>loxP</sup> allele.

Supplemental Figure 4

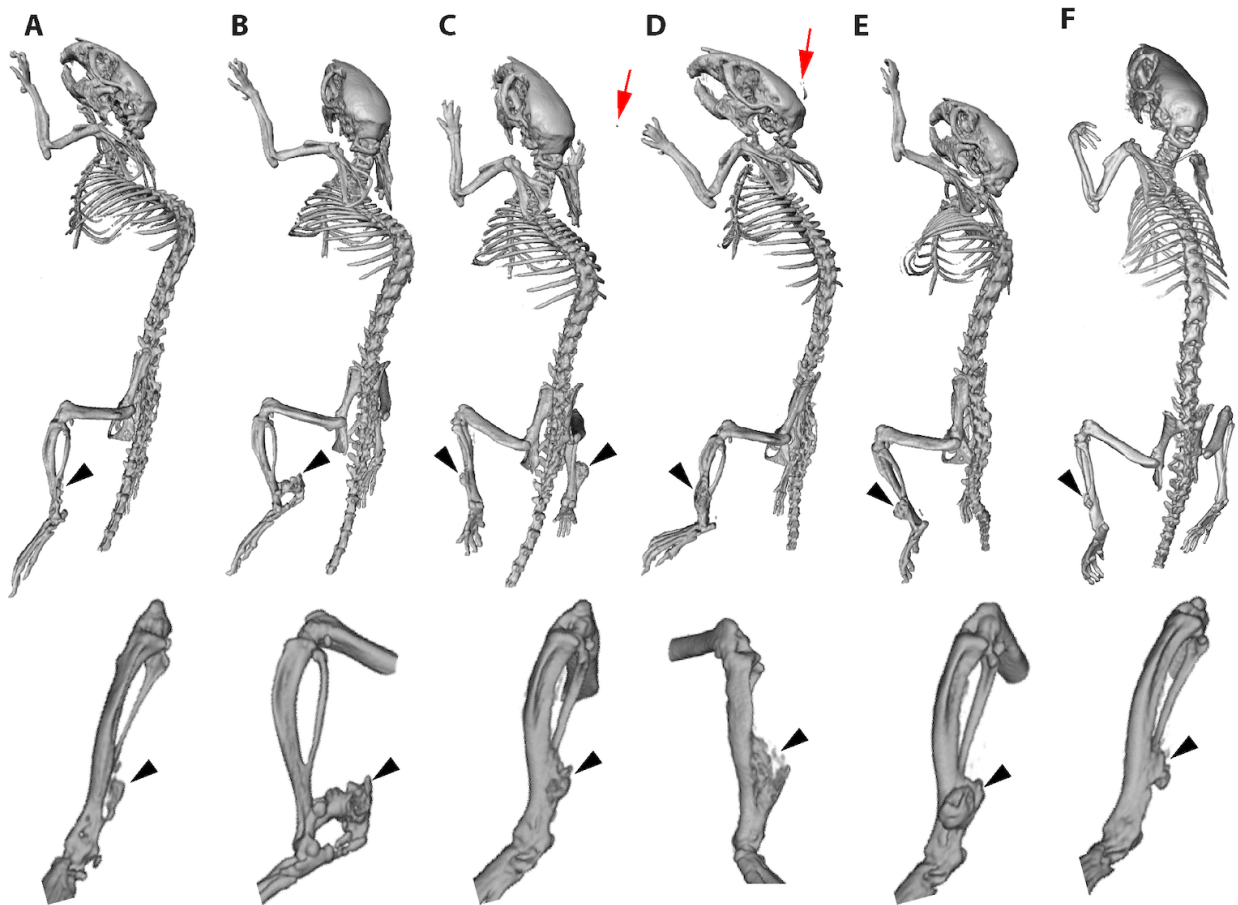

|              |                |                |                |                            |                |                   |
|--------------|----------------|----------------|----------------|----------------------------|----------------|-------------------|
| <i>Acvr1</i> | <i>R206H/+</i> | <i>R206H/+</i> | <i>R206H/+</i> | <i>R206H/+</i>             | <i>R206H/+</i> | <i>tnR206H/+</i>  |
| <i>R26</i>   | <i>ACVR1/+</i> | <i>ACVR1/+</i> | <i>ACVR1/+</i> | <i>ACVR1/+</i>             | <i>ACVR1/+</i> | <i>ACVR1/+</i>    |
| Cre type     | None           | None           | None           | <i>Hprt1<sup>Cre</sup></i> | None           | <i>Pdgfra-Cre</i> |
| Age          | 15.8 MO        | 13.1 MO        | 15.7 MO        | 15.3 MO                    | 13.8 MO        | 10.3 MO           |

**Figure S4. Spontaneous exostosis in the legs of some aged FOP mice that carried the  $R26^{ACVR1}$  allele.** The table shows the genotype and age (months) of each mouse. (A - E)  $\mu$ CT images of all five  $Acvr1^{R206H/+};R26^{ACVR1/+}$  mice (n=17, 12-months-of-age or older) that developed exostosis, which presented at the distal tibia (black arrowheads). All affected mice were females. In 6 of 17 mice, HO developed in the ear pierced with a metal tag (red arrows in C and D); this HO depended on  $Acvr1^{R206H}$  but was not specific to aged mice. (F)  $Acvr1^{tnR206H/+};R26^{ACVR1/+};Pdgfra-Cre$  mouse with exostosis of the distal tibia (black arrowhead). Below each whole-mount is the left leg of each mouse shown at higher magnification. In some cases, the limb was rotated to better show the ectopic skeletal growth.

Supplemental Figure 5

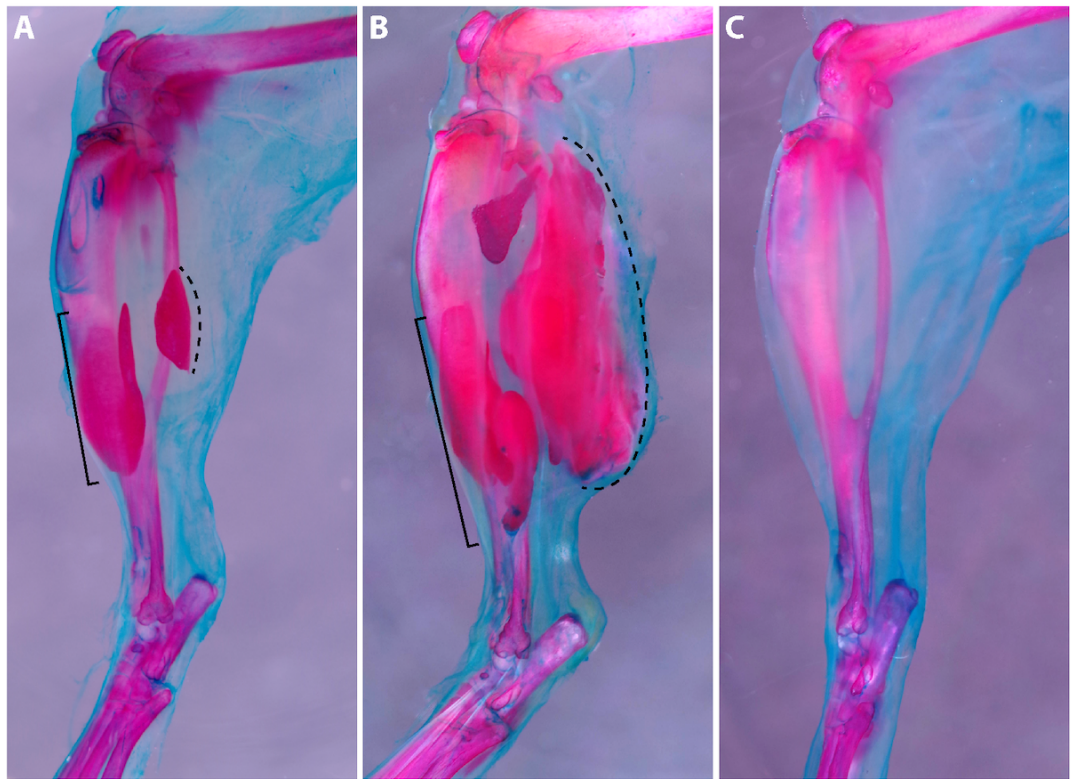

|              |                  |                     |                     |
|--------------|------------------|---------------------|---------------------|
| <i>Acvr1</i> | <i>tnR206H/+</i> | <i>tnR206H/flox</i> | <i>tnR206H/flox</i> |
| <i>R26</i>   | <i>+/+</i>       | <i>+/+</i>          | <i>nACVR1/+</i>     |
| Cre type     | Tie2-Cre         | Tie2-Cre            | Tie2-Cre            |

**Figure S5. Inhibition of exacerbated HO by ACVR1 over-expression.** The table shows the genotype of each mouse. **(A)** Representative injury-induced HO response of adult *Acvr1*<sup>*tnR206H/+*</sup>;Tie2-Cre mouse. The limb was ABAR-stained 21-day after cardiotoxin injection of the TA muscle. **(B)** Removal of the wild-type *Acvr1* allele exacerbated HO. Hatched lines and brackets in (A) and (B) indicate heterotopic bone in the soft tissue and aberrant skeletal expansion on the surface of the tibia, respectively. **(C)** Over-expression of ACVR1 completely prevented HO in *Acvr1*<sup>*tnR206H/flox*</sup>; *R26*<sup>*ACVR1/+*</sup>;Tie2-Cre mice.

Supplemental Figure 6

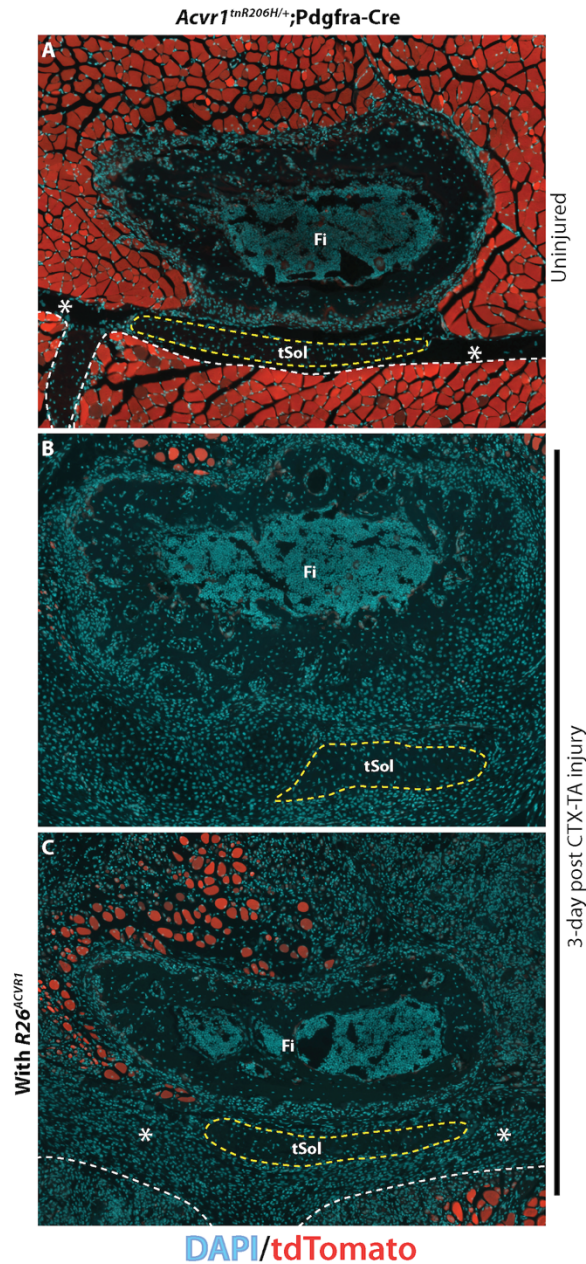

**Figure S6. Injury-induced hyper-cellularity of intermuscular fascia.** Tissue was collected 3 days after cardiotoxin-induced injury of the tibialis anterior (TA) muscle. **(A)** Transverse section through the lower limb showing the typical appearance of the transverse intermuscular septum (asterisks). Note the low density of mononuclear cells in the septum. **(B)** In FOP mice, the transverse septum has lost its well-defined structure and become dramatically hypercellularized by 3 days post-injury. **(C)** The response to muscle injury of FOP mice carrying the *R26<sup>ACVR1</sup>* allele is comparable to that of control mice. Asterisks denote the widened septum. White dashed lines represent the boundary between the septum and adjacent skeletal muscle. Muscle fibers express tdTomato from the unrecombined *Acvr1<sup>tnR206H</sup>* allele (red). Red fluorescence of unrecombined mononuclear cells is not evident, particularly at this magnification, because the exposure time was set to optimally capture the intense fluorescence of the muscle fibers. Fi, fibula; tSol, soleus tendon.

Supplemental Figure 7

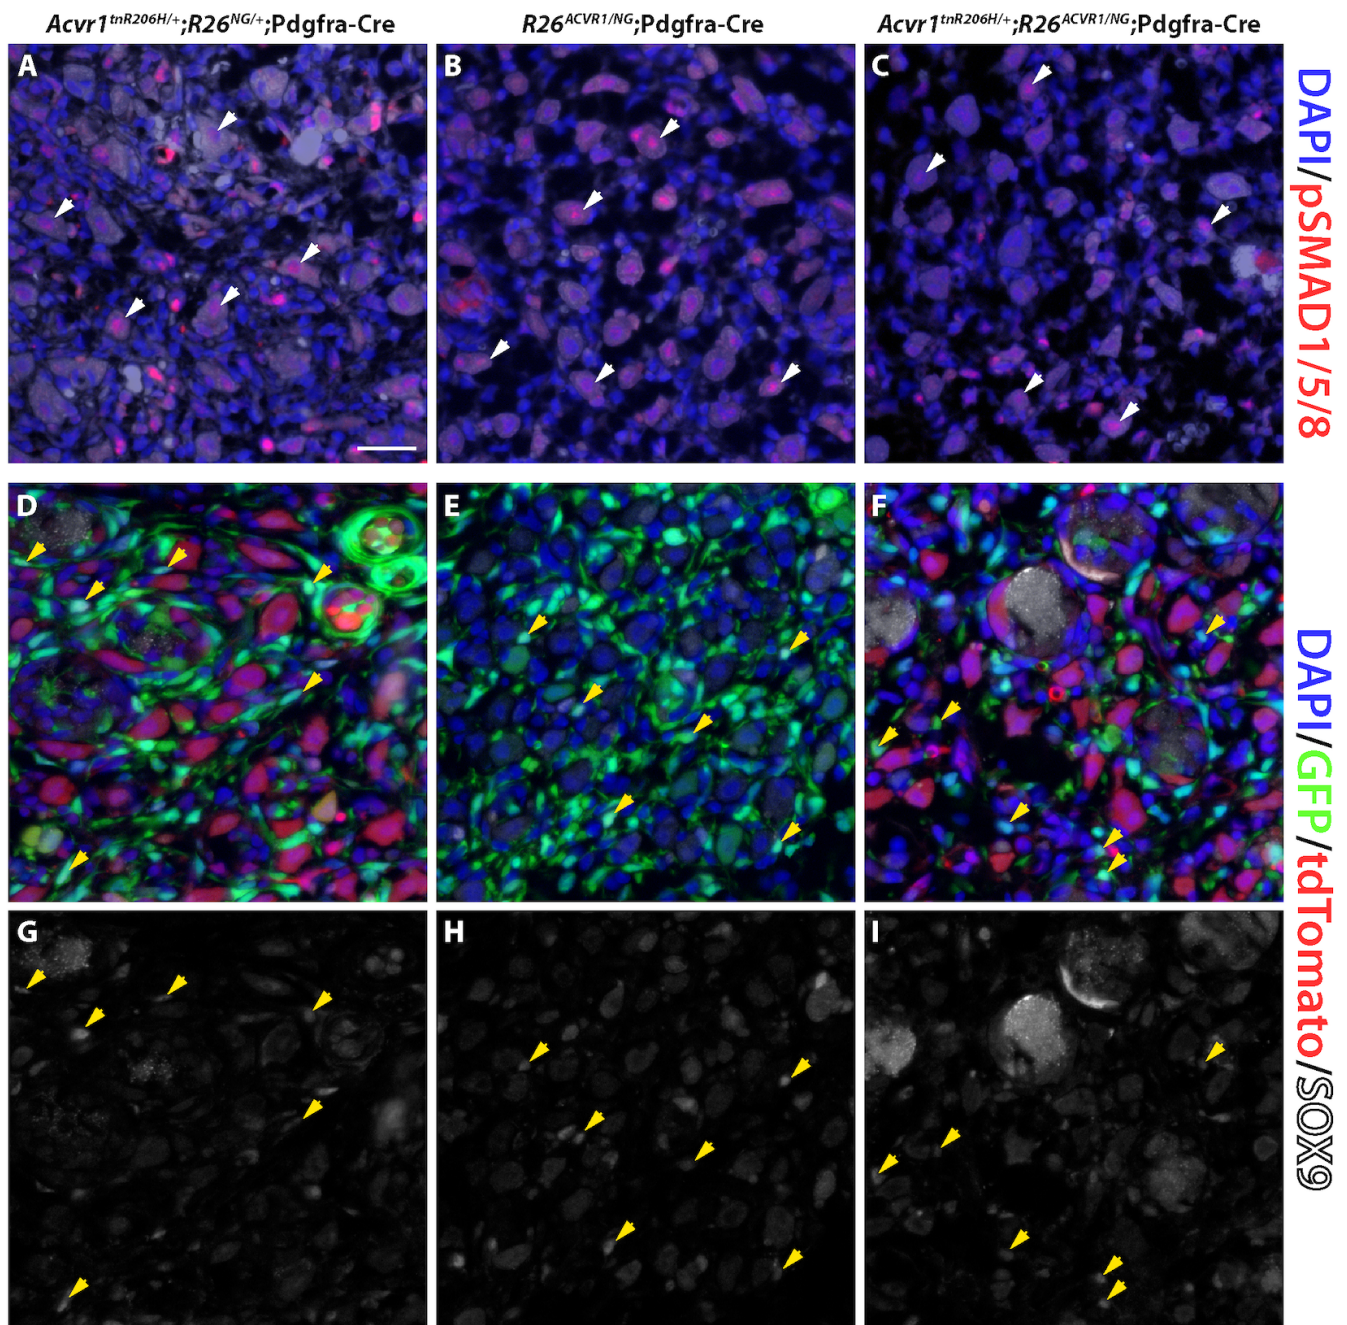

**Figure S7. No discernible effect of *ACVR1* over-expression on pSMAD1/5/8 or SOX9 levels in the TA muscle 3 days post-injury. (A-C)** The nuclei of some nascent muscle fibers are weakly positive for pSMAD1/5/8 irrespective of genotype. Autofluorescence through the green channel was colorized white to show the tissue structure. Note that GFP fluorescence from the recombined *R26<sup>NG</sup>* reporter was destroyed by the antigen retrieval method used to detect pSMAD1/5/8. White arrowheads indicate representative regenerating myofibers with pSMAD1/5/8-positive nuclei. **(D-F)** Simultaneous detection of GFP from the recombined *R26<sup>NG</sup>* reporter, tdTomato from the unrecombined *Acvr1<sup>tnR206H</sup>* allele, and DAPI. Nascent muscle fibers are the source of most of the tdTomato signal in (D) and (F). **(G-I)** Same sections as in (D-F) showing staining for SOX9. The yellow arrowheads in (D-I) indicate representative GFP+ recombined cells with weak SOX9 staining.
